# Supplementary material for: Nanoparticle manipulation based on chiral plasmon effects
Source: Royal Society of Chemistry journal article supplement (doi:10.1039/d4cp01718h), 2024-01-01
Supplement: d4cp01718h1.pdf [file d4cp01718h1.pdf]

## Nanoparticle manipulation based on chiral plasmon effect

Huaxin Li<sup>1</sup>, Yatao Ren<sup>1,2,\*</sup>, Mingjian He<sup>1,2,\*</sup>, Hong Qi<sup>1,2</sup>

1. School of Energy Science and Engineering, Harbin Institute of Technology, Harbin, China,  
150001

2. Key Laboratory of Aerospace Thermophysics, Ministry of Industry and Information  
Technology, Harbin, China, 150001

\*Corresponding author: Email: renyt@hit.edu.cn (YT Ren); hemingjian@hit.edu.cn (MJ He)

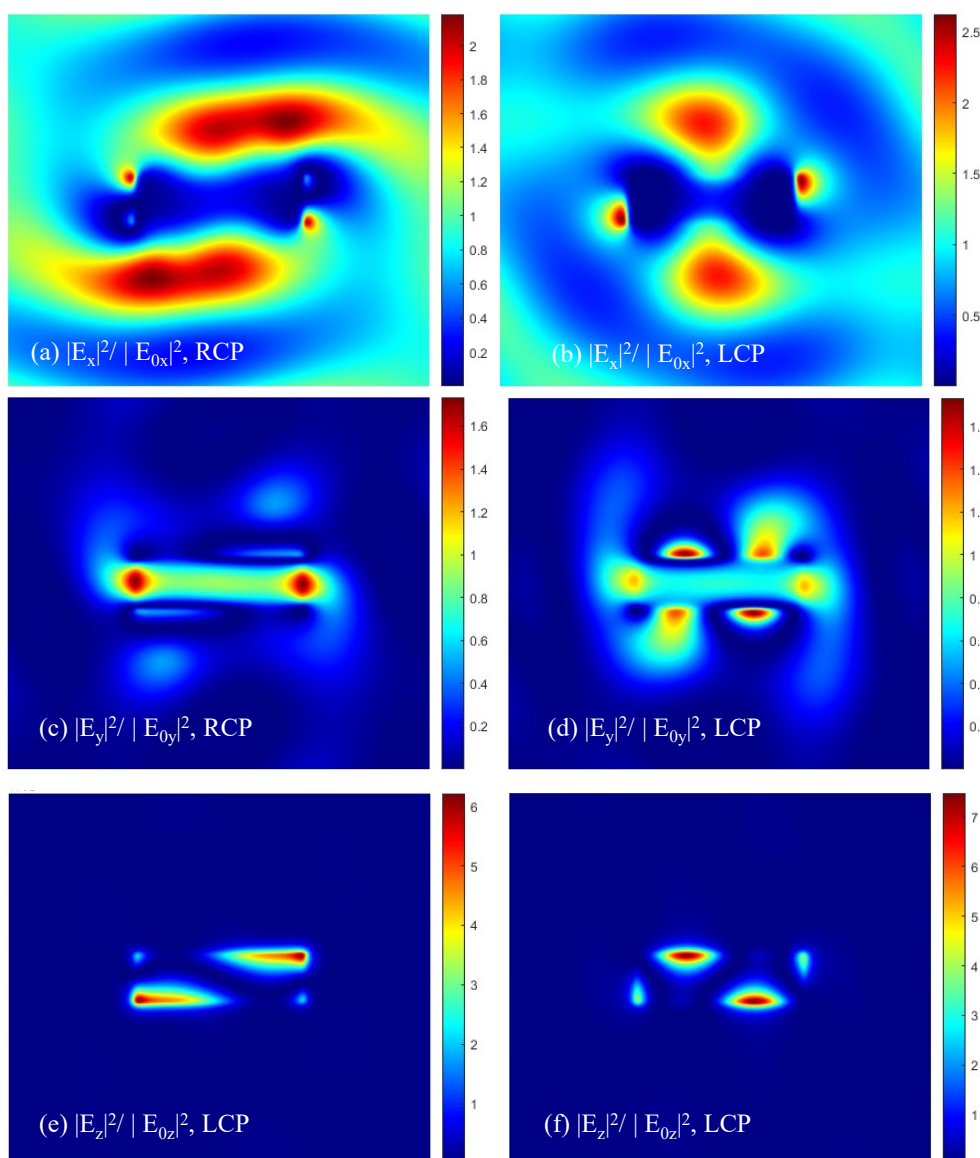

Fig. S1 The electric field components for circularly polarized light of different chirality incident on it.

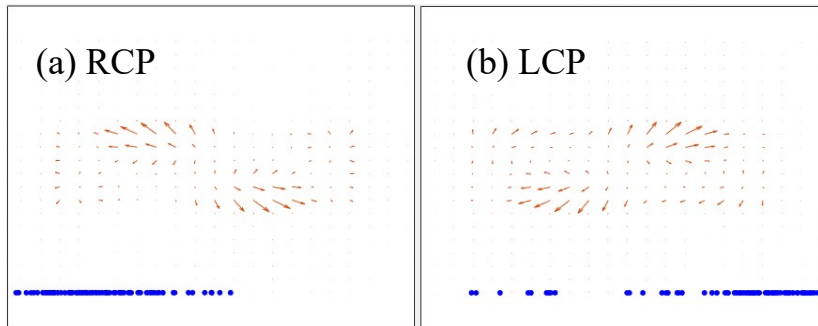

Fig. S2 Distribution of PS particles at the outlet of a single chiral structure

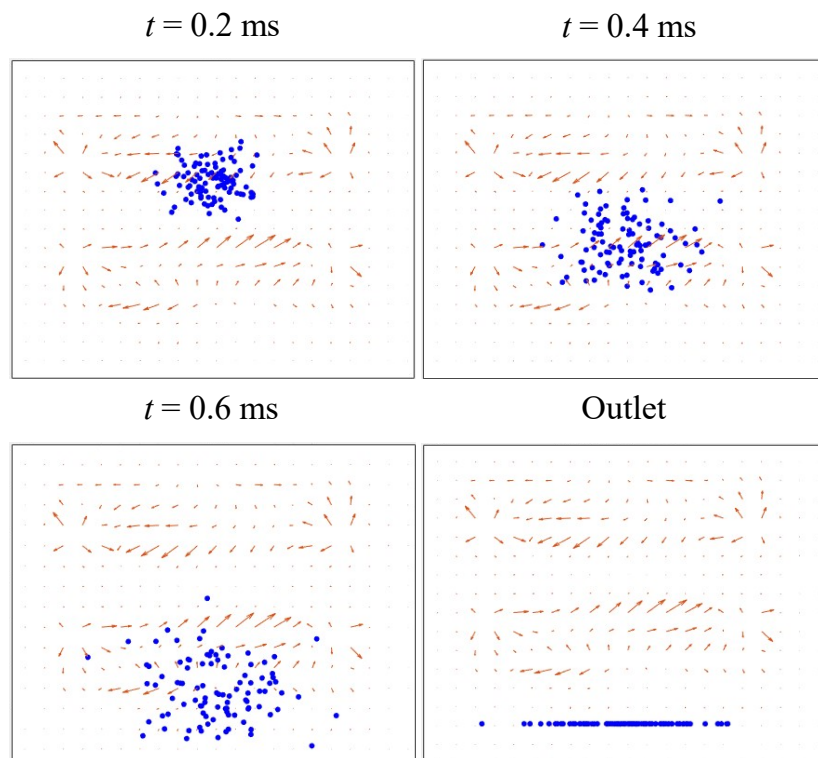

Fig. S3 Motion of PS nanoparticles passing through the chiral plasmon structure with out incident light
